# Supplementary material for: Dual Inhibition of Ornithine Decarboxylase and A1 Adenosine Receptor Efficiently Suppresses Breast Tumor Cells
Source: PubMed Central journal article supplement (PMC7991832; doi:10.3389/fonc.2021.636373), 2021-03-11
Supplement: DataSheet_1.pdf [file DataSheet_1.pdf]

## Supplementary Data

### **Dual inhibition of ornithine decarboxylase and A<sub>1</sub> adenosine receptor efficiently suppresses breast tumor cells**

Hongyan Ma<sup>1,2,3</sup>, Qizhang Li<sup>1,2</sup>, Jing Wang<sup>1,2,3</sup>, Jing Pan<sup>1,2,3</sup>, Zhengding Su<sup>1,2</sup>, Sen Liu<sup>1,2,3,\*</sup>

<sup>1</sup> National "111" Center for Cellular Regulation and Molecular Pharmaceutics, Key Laboratory of Industrial Fermentation (Ministry of Education), Hubei University of Technology, Wuhan 430068, China

<sup>2</sup> Institute of Biomedical and Pharmaceutical Sciences, Hubei Key Laboratory of Industrial Microbiology, Hubei University of Technology, Wuhan, 430068, China

<sup>3</sup> Hubei Key Laboratory of Tumor Microenvironment and Immunotherapy, Medical College of China Three Gorges University, Yichang 443002, China

\*Corresponding author: [senliu.ctgu@gmail.com](mailto:senliu.ctgu@gmail.com), ORCID: 0000-0001-5182-7241.

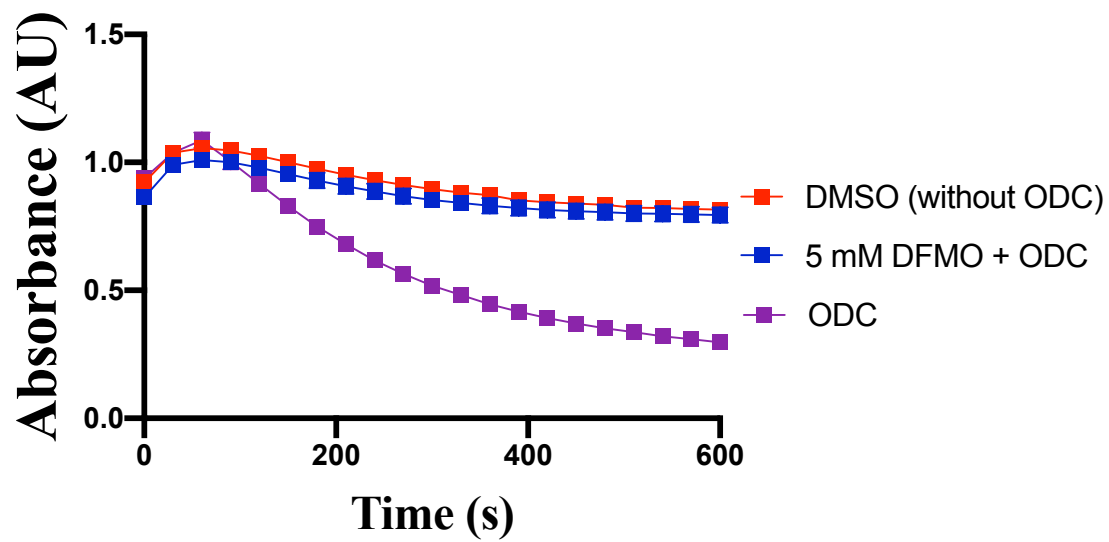

**Figure S1.** The inhibition of DFMO on ODC activity measured by the CO<sub>2</sub> kit.

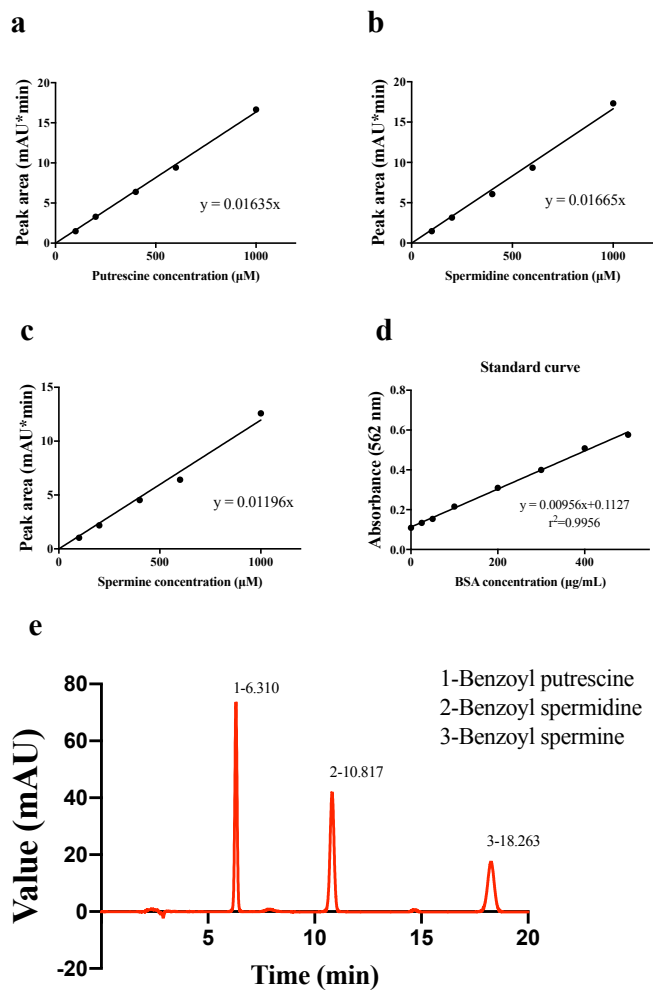

**Figure S2.** The standard curves for the HPLC quantification of polyamines (**a**, **b**, **c**) and total proteins (**d**). An HPLC spectrum of the mixed polyamine samples is shown in **e**.

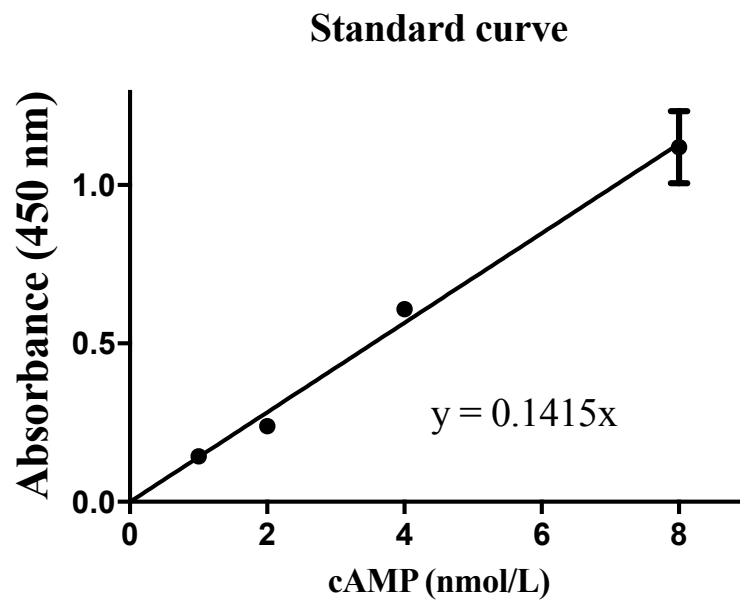

**Figure S3.** The standard curve for cAMP quantification.
